# Supplementary material
Source: PubMed Central journal article supplement (PMC4171064)
Supplement: NIHMS613274-supplement-1.pdf [file NIHMS613274-supplement-1.pdf]

**Table S1.** Sequences of primers for PCR

| Species          | Target gene      | Sequence (5'-3')                                            |
|------------------|------------------|-------------------------------------------------------------|
| -                | neo*             | F: GCTTGGGTGGAGAGGCTATTC<br>R: CAAGGTGAGATGACAGGAGATC       |
| Mouse            | hmox-1*          | F: GTACACTGACTGTGGGTGGGGGAG<br>R: AGGGCCGAGTAGATATGGTAC     |
| Mouse            | hmox-1           | F: CACGCATATACCCGCTACCT<br>R: CCAGAGTGTTCATTCGAGCA          |
| Mouse            | iNOS             | F: CACCTTGGAGTTCACCCAGT<br>R: ACCACTCGTACTTGGGATGC          |
| Mouse            | TNF- $\alpha$    | F: CTGGGACAGTGACCTGGACT<br>R: GCACCTCAGGGAAGAGTCTG          |
| Mouse            | IL-1 $\beta$     | F: ACCTGCTGGTGTGTGACGTTCC<br>R: GGTCCGACAGCACGAGGCT         |
| Mouse            | IL-12p40         | F: GAAAGACCCTGACCATCACT<br>R: CCTTCTCTGCAGACAGAGAC          |
| Mouse            | CXCL10           | F: GGTCTGAGTGGGACTCAAGG<br>R: GTGGCAATGATCTCAACACG          |
| Mouse            | YM1              | F: ACTTTGATGGCCTCAACCTG<br>R: AATGATTCCTGCTCCTGTGG          |
| Mouse            | RELM- $\alpha$   | F: GCTGATGGTCCCAGTGAATA<br>R: CAGTAGCAGTCATCCCAGCA          |
| Mouse            | CCL17            | F: CCCATGAAGACCTTCACCTC<br>R: CATCCCTGGAACACTCCACT          |
| Mouse            | DCIR             | F: TCCCCTGCTACTTGGTTCC<br>R: GCCTGTATCCCACAACCCTA           |
| Mouse            | STAB-1           | F: TATGTGCCGACCAGGTATGA<br>R: CTGCTCTTAACCGCAGGAAC          |
| Mouse            | IL-27R- $\alpha$ | F: CCTCAGTTTGGGGATTGAGA<br>R: TTTGACTGCTCACGTTCCCTG         |
| Mouse            | DECTIN-1         | F: GGAATCCTGTGCTTTGTGGT<br>R: ATTCTGTGGGCTTGTGGTTC          |
| Mouse            | CD209            | F: CTGGGAGAGGAAGACTGTGC<br>R: CTTGCTAGGGCAGGAAGTTG          |
| Mouse            | IL-10            | F: CCAAGCCTTATCGGAAATGA<br>R: TCACTCTTCACCTGCTCCAC          |
| Mouse            | SPHK1            | F: TCCTGGAGGAGGCAGAGATA<br>R: GCTACACAGGGGTTTCTGGA          |
| Mouse            | LIGHT            | F: CTGCATCAACGTCTTGGAGA<br>R: GATACGTCAAGCCCCTCAAG          |
| Mouse            | CCL1             | F: GGATGTTGACAGCAAGAGCA<br>R: TAGTTGAGGCGCAGCTTTCT          |
| Mouse            | IFN- $\gamma$    | F: GCTTTGCAGCTCTTCCTCAT<br>R: GTCACCATCCTTTTGCCAGT          |
| Mouse            | IL-17            | F: TCCAGAAGGCCCTCAGACTA<br>R: AGGACCAGGATCTCTTGCTG          |
| Mouse            | $\beta$ -actin   | F: CCAGAGCAAGAGAGGTATCC<br>R: CTGTGGTGGTGAAGCTGTAG          |
| Mouse            | 18S rRNA         | F: GGACCAGAGCGAAAGCATTGCC<br>R: TCAATCTCGGGTGGCTGAACGC      |
| <i>H. pylori</i> | ureA             | F: TGTTGGCGACAGACCGTTCAAATC<br>R: GCTGTCCCGCTCGCAATGTCTAAGC |

\*Primers for genotyping of mice.

**Table S2. List of antibodies**

| Antibody                                         | Dilution | Application     | Source                 |
|--------------------------------------------------|----------|-----------------|------------------------|
| Rabbit polyclonal anti-human/mouse HO-1          | 1:1000   | WB*             | Stressgen              |
|                                                  | 1:100    | IF <sup>†</sup> |                        |
|                                                  | 1:250    | FL <sup>‡</sup> |                        |
| Rabbit polyclonal anti-mouse iNOS                | 1:100    | IF              | Pierce                 |
| Rabbit polyclonal anti-mouse p-p38-Thr180/Tyr182 | 1:2000   | WB              | Invitrogen             |
| Mouse monoclonal anti-mouse p38                  | 1:2000   | WB              | Santa Cruz             |
| Rabbit polyclonal anti-human/mouse ERK1/2        | 1:1000   | WB              | Invitrogen             |
| Rabbit polyclonal anti-mouse NRF-2               | 1:1000   | WB              | Abcam                  |
| Mouse monoclonal anti-p-Tyr (PY99)               | 1:1000   | WB              | Santa Cruz             |
| Rat polyclonal anti-F4/80, Alexa 488-conjugated  | 1:250    | FL              | Invitrogen             |
| Rat polyclonal anti-F4/80                        | 1:50     | IF              | Invitrogen             |
| Rabbit polyclonal anti-CagA                      | 1:10000  | WB              | Austral Biological     |
| Mouse monoclonal anti-human/mouse $\beta$ -actin | 1:10000  | WB              | Sigma                  |
| Goat anti-rabbit IgG, HRP-labeled                | 1:5000   | WB              | Sigma                  |
| Goat anti-mouse IgG, HRP-labeled                 | 1:5000   | WB              | Sigma                  |
| Rabbit anti-rat IgG, TRITC-conjugated            | 1:100    | IF              | Sigma                  |
| Donkey anti-rabbit IgG, DyLight 488-conjugated   | 1:100    | IF              | Jackson ImmunoResearch |
| Goat anti-rabbit IgG, APC-conjugated             | 1:200    | FL              | Jackson ImmunoResearch |

\*WB, Western Blot

<sup>†</sup>IF, Immunofluorescence

<sup>‡</sup>FL, Flow cytometry

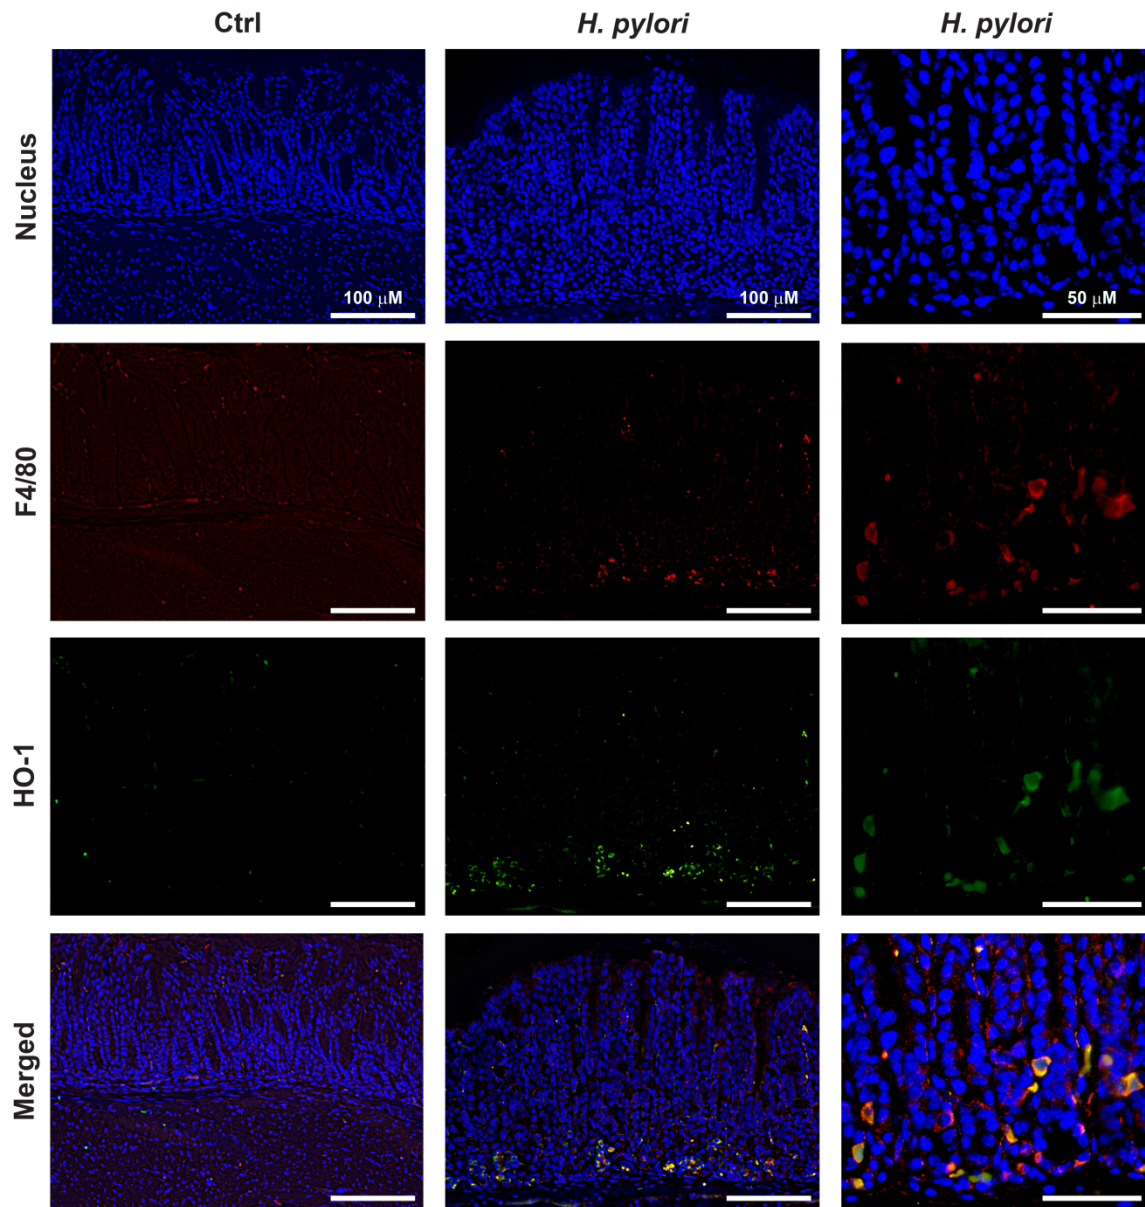

**FIGURE S1.** Immunofluorescence for nucleus (DAPI; blue), F4/80 (TRITC; red), and HO-1 (DyLight 488; green) is shown for uninfected control (Ctrl) mice and for mice infected with *H. pylori* PMSS1. Data are representative of 4-6 mice for each group.

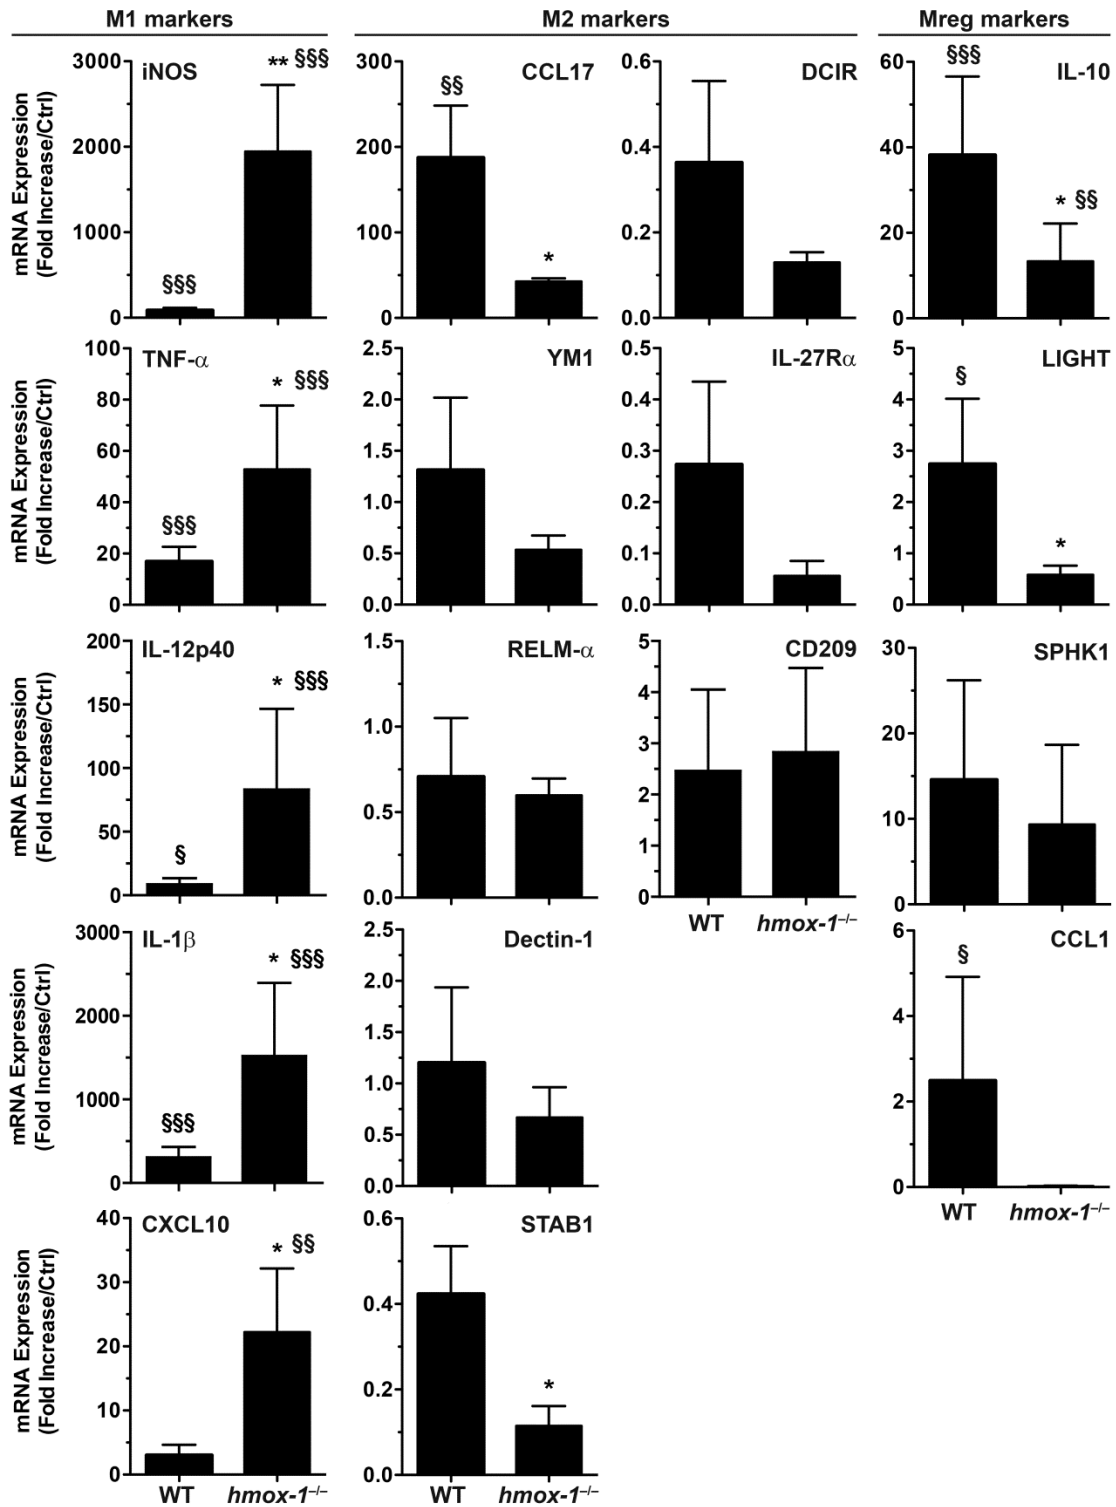

**FIGURE S2.** Expression of the genes encoding markers of the M1, M2, and Mreg populations in peritoneal macrophages from WT or *hmox-1*<sup>-/-</sup> mice infected with *H. pylori* 60190 for 24 h; n = 6 mice per genotype. \**P* < 0.05, \*\**P* < 0.01 vs. infected WT macrophages; §*P* < 0.05, §§*P* < 0.01, §§§*P* < 0.001 vs. uninfected cells.
